# Supplementary material for: Intrinsic limit of contact resistance in the lateral heterostructure of metallic and semiconducting PtSe2
Source: Royal Society of Chemistry journal article supplement (doi:10.1039/d0nr03001e), 2020-01-01
Supplement: d0nr03001e1.pdf [file d0nr03001e1.pdf]

# Intrinsic Limit of Contact Resistance in Lateral Heterostructure of Metallic and Semiconducting PtSe<sub>2</sub>

*Eunyeong Yang, Jae Eun Seo, Dongwook Seo and Jiwon Chang\**

Department of Electrical and Computer Engineering, Ulsan National Institute of Science and  
Technology (UNIST), Ulsan 44919, South Korea

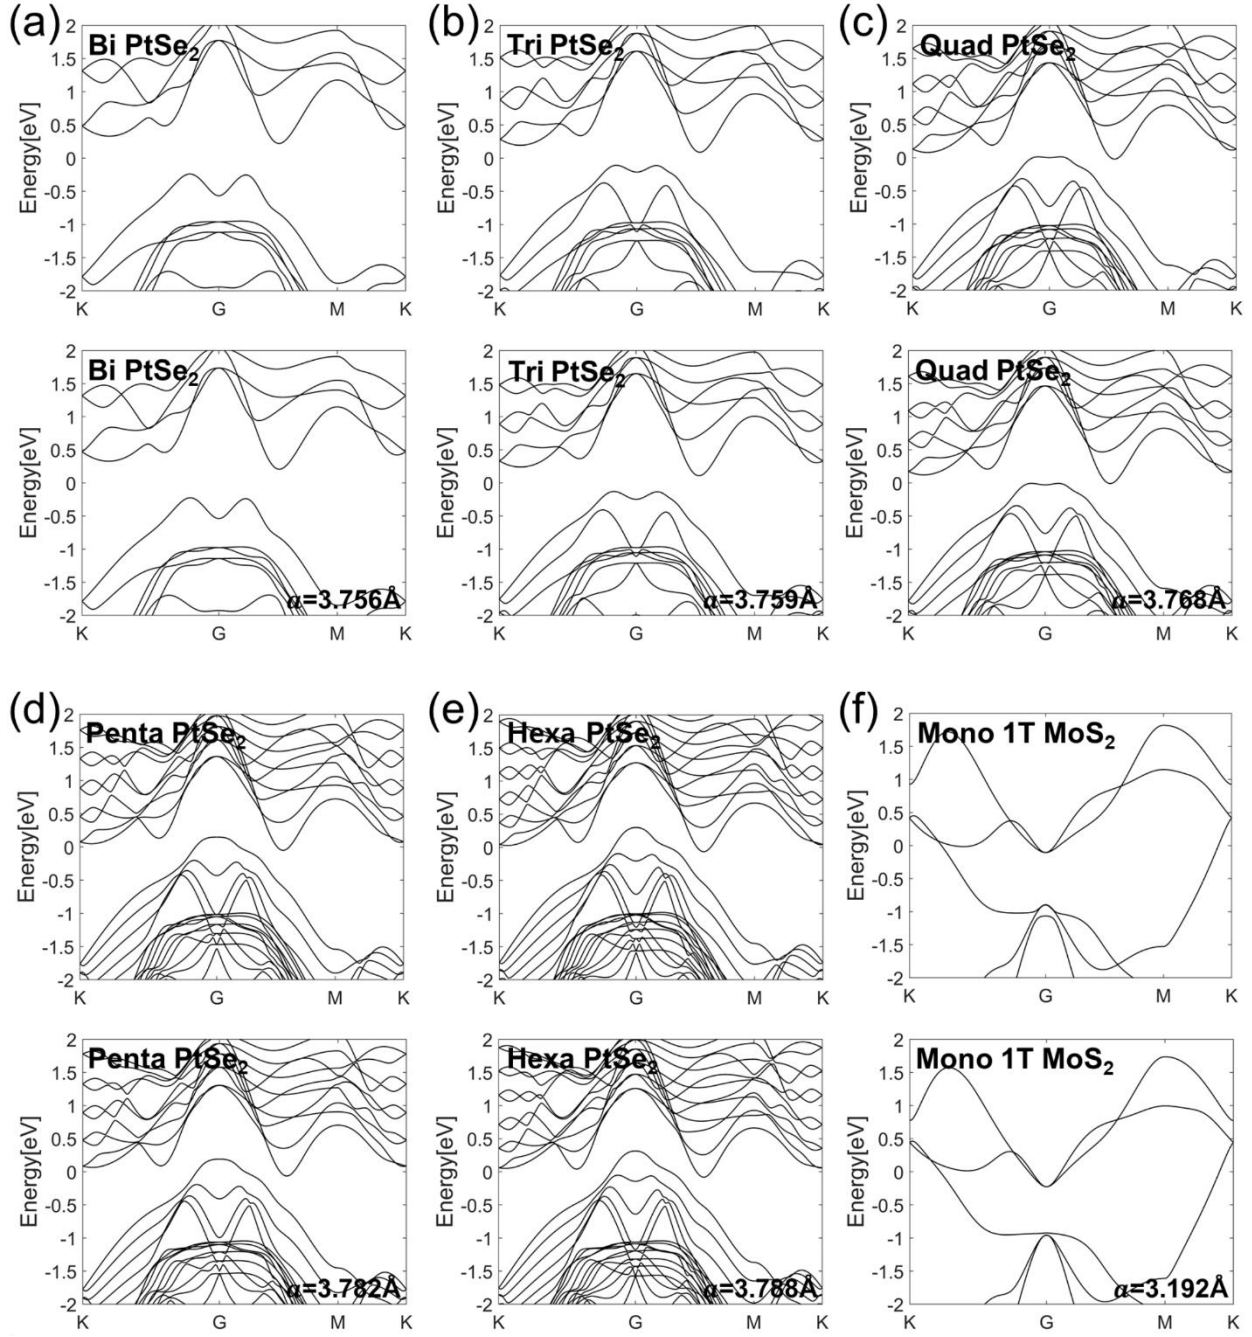

Figure S1. Band structures of (a) bilayer PtSe<sub>2</sub>, (b) trilayer PtSe<sub>2</sub>, (c) quadlayer PtSe<sub>2</sub>, (d) pentalayer PtSe<sub>2</sub>, (e) hexalayer PtSe<sub>2</sub> and (f) monolayer 1T MoS<sub>2</sub> without (top) and with (bottom) the optimization of the in-plane lattice constant.
